# Supplementary material for: Fluorescence in situ hybridization (FISH) and cell sorting of living bacteria
Source: Sci Rep. 2019 Dec 9;9:18618. doi: 10.1038/s41598-019-55049-2 (PMC6901588; doi:10.1038/s41598-019-55049-2)
Supplement: Supplementary file 1 — Supplementary Info [file 41598_2019_55049_MOESM1_ESM.docx]

**Supplementary Information**

**Fluorescence *in situ* hybridization (FISH) and cell sorting of living bacteria**

Giampiero Batani1,2, Kristina Bayer3, Julia Böge3, Ute Hentschel3,4 and Torsten Thomas1*

1Centre for Marine Science and Innovation and School of Biological, Earth and Environmental Sciences, The University of New South Wales, Sydney, New South Wales, Australia

2Faculty of Science, University of South Bohemia, Ceske Budejovice, Czech Republic

3GEOMAR Helmholtz Centre for Ocean Research Kiel, Düsternbrooker Weg 20, 24105 Kiel, Germany

4Christian-Albrechts University of Kiel, Christian-Albrechts-Platz 4, 24118 Kiel, Germany

*Corresponding author: email: t.thomas@unsw.edu.au

**Supplementary Figures**


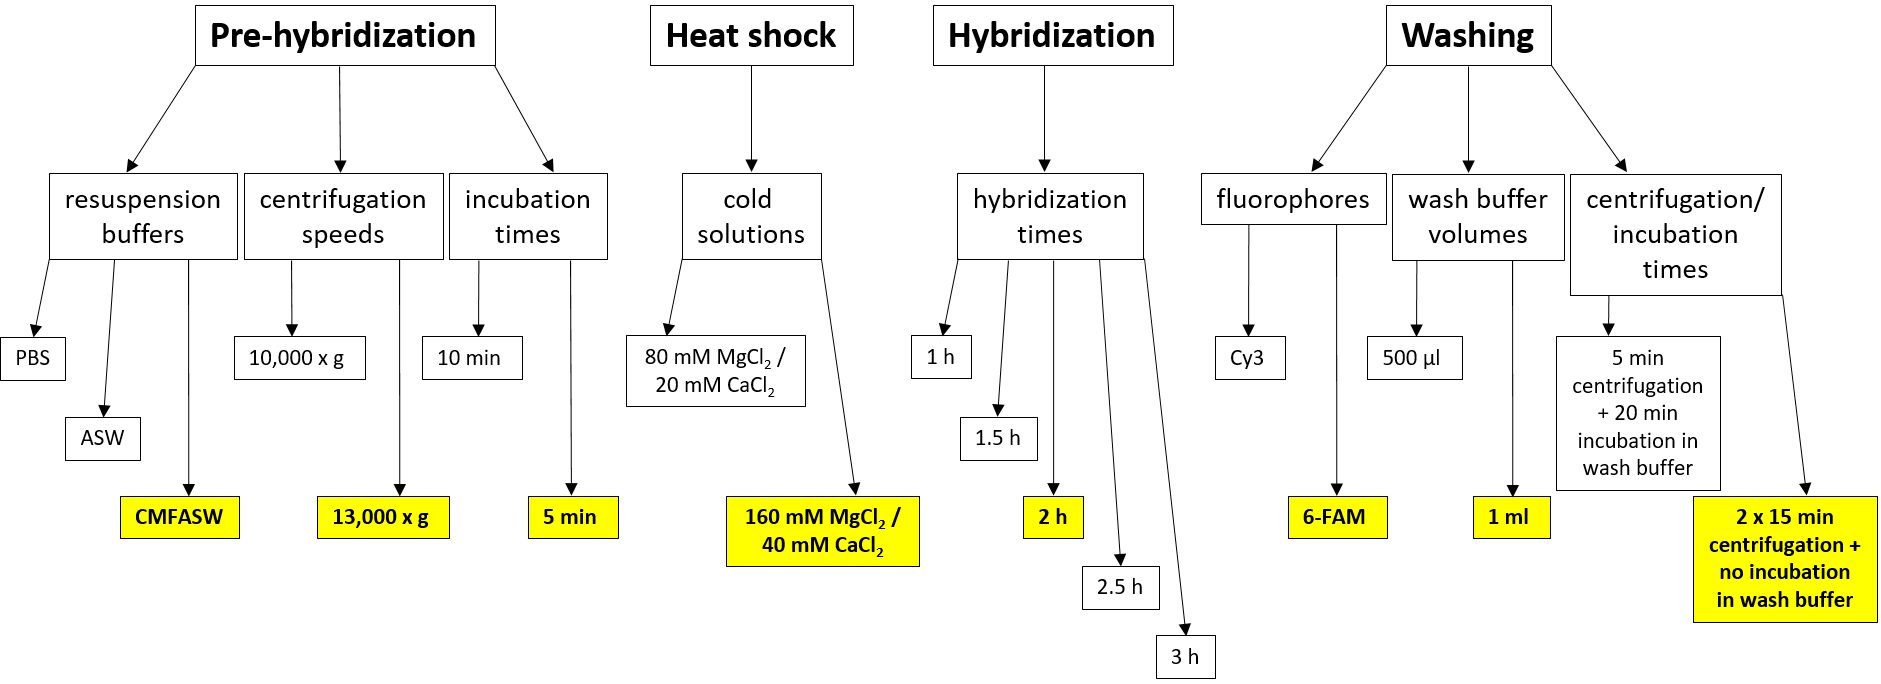


**Supplementary Figure S1.** Optimization processes undertaken at each FISH step. The yellow boxes show the conditions used in the final live-FISH protocol (see Table 2) that maximized viability of both Gram-positive and Gram-negative bacteria. PBS= phosphate Buffered Saline solution; ASW=artificial seawater; CMFASW= Ca2+- and Mg2+-free artificial seawater.

**Supplementary Figure S2.** Optimization of the hybridization step. **a)** CFU ml-1 is expressed as a function of time (1, 1.5, 2, 2.5 and 3 h of incubation) for both *Bacillus* sp. AU29 and *Ruegeria* sp. AU82. Error bars show standard deviations. **b)** The fluorescence images show how a signal in the cells was only observed from 2 h of hybridization onwards for both species analyzed. Scale bars, 10 µm.

**Supplementary Figure S3.** Growth of (A) *Pseudovibrio* sp. SB55 hybridized with the probe PARA739_6-Fam and (B) *Bacillus* sp. AU29 hybridized with the probe LGC339_6-Fam, and both counterstained with PI. In panel (A), arrows point at the wells showing turbidity and containing 1 and 10 cells from the 6-Fam positive and PI negative (and hence potentially live) population. The identity of *Pseudovibrio* sp. SB55 was confirmed in all wells with growth. Nothing grew in the wells where 100 cells of the 6-Fam positive and PI negative population and from the 6-Fam negative and PI positive (and hence dead) population were sorted (see Fig. 2 i.). In panel (B), the arrows point at the wells showing turbidity in the R3 population (6-Fam positive and PI negative) and corresponding to *Bacillus* sp. AU29, while no growth was observed for the R4 (6-Fam positive and PI positive) and R6 (6-Fam negative and PI positive) populations (see Fig. 2 ii.). The control wells with only marine broth (MB - e.g. where no cells were sorted into) were negative.

**Supplementary Figure S4.** Growth of *Pseudovibrio* sp. SB55 within themock community hybridized with the probe PARA739_6-Fam and counterstained with PI. The arrows point at the wells showing turbidity in the three populations gated and sorted (see Fig. 2 iii.). In the “6-Fam positive and PI negative” (and hence potentially live *Pseudovibrio* sp. SB55) population, growth corresponded successfully to *Pseudovibrio* sp. SB55 cells. In the “6-Fam negative and PI positive” (and hence dead) population, turbidity corresponded to contaminationby *Staphylococcus epidermidis*. Finally, in the “6-Fam negative and PI negative” population corresponding to all unstained events, growth consisted of *Bacillus* sp. AU29 cells. The control wells with only marine broth (MB - e.g. where no cells were sorted into) were negative.

**
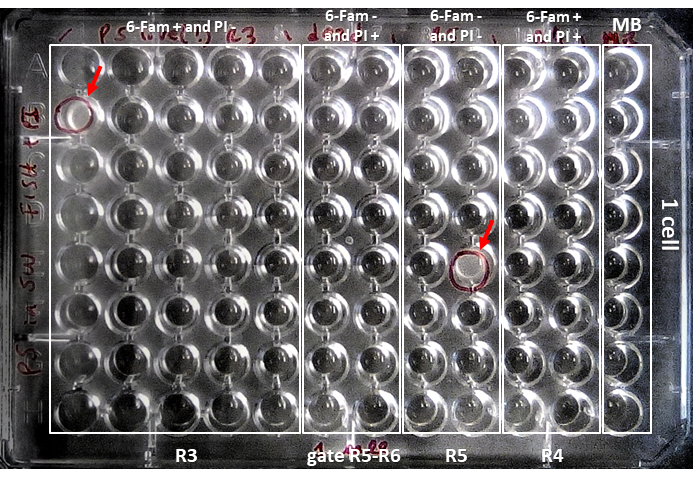
**

**Supplementary Figure S5.** Growth of *Pseudovibrio* sp. SB55 inoculated into Baltic seawater, hybridized with the probe PARA739_6-Fam and counterstained with PI. Turbidity (arrows) was observed only in the 6-Fam positive and PI negative (and hence potentially live) population (R3) and in the 6-Fam negative and PI negative (R5) one corresponding to all unstained events (see Fig. 2 iv.). Growth in the 6-Fam positive and PI negative population corresponded to *Pseudovibrio* sp. SB55, while turbidity in the 6-Fam negative and PI negative one was due to contamination. The control wells with only marine broth (MB - e.g. where no cells were sorted into) were negative.

**
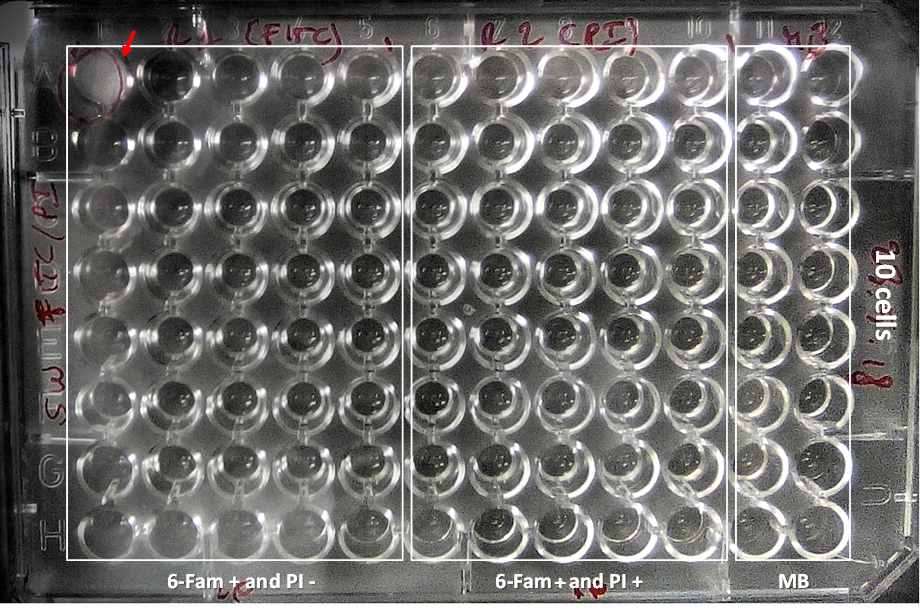
**

**Supplementary Figure S6.** Growth of Alphaproteobacteria from the Baltic seawater microbial community when hybridized with the probe ALF968_6-Fam. The arrow points at the well showing turbidityin the 6-Fam positive and PI negative population (corresponding to potentially living cells - see Fig. 3) and confirmed to be affiliated within the alphaproteobacterial genus *Brevundimonas*. Nothing grew in the wells corresponding to the 6-Fam positive and PI positive (and hence dead) population (see Fig. 3) and the control ones with only marine broth (MB - e.g. where no cells were sorted into).

**Supplementary Tables**

**Supplementary Table S1.** Comparison of the cell viability between each of the eleven treatments (combinations of different buffers, centrifugation speeds and incubation times during the pre-hybridization step of the live-FISH procedure) and the conditions of the modified FFF protocol (PBS - 10,000 x g - 5 min) for *Bacillus* sp. AU29 and *Ruegeria* sp. AU82. Significance was assessed with a Kruskal-Wallis test.

*ns = not significant;

*mean rank differences = differences between the mean rank of the modified FFF protocol and the mean rank of each treatment. *Boldface indicates statistical significance (p ≤ 0.05 for the Kruskal-Wallis test, and *p ≤ 0.05 but > 0.01 and **p ≤ 0.01 for the Dunn’s multiple comparisons test).

**Supplementary Table S2.** Comparison of the cell viability between each of the twelve treatments (combinations of different buffers, centrifugation speeds and incubation times during the pre-hybridization step of the live-FISH procedure) and the control consisting of cell numbers before the treatments (e.g. after incubation overnight) for both *Bacillus* sp. AU29 and *Ruegeria* sp. AU82. Significance was assessed with a Kruskal-Wallis test.

*ns = not significant;

*mean rank differences = differences between the mean rank of the control and the mean rank of each treatment.

*Boldface indicates statistical significance (p ≤ 0.05 for the Kruskal-Wallis test, and *p ≤ 0.05 but > 0.01 and **p ≤ 0.01 for the Dunn’s multiple comparisons test).

**Supplementary Table S3.** Comparison of the cell viability between each of the three treatments (combination of incubations in different cold solutions during the heat shock step of the live-FISH procedure) and the control consisting of cell numbers before the treatments (e.g. after pre-hybridization) were tested on both *Bacillus* sp. AU29 and *Pseudovibrio* sp. SB55. Significance was assessed with a Kruskal-Wallis test.

*ns = not significant;

*mean rank differences = differences between the mean rank of the control and the mean rank of each treatment.

*Boldface indicates statistical significance (p ≤ 0.05 for the Kruskal-Wallis test, and *p ≤ 0.05 but > 0.01 for the Dunn’s multiple comparisons test).
